# Supplementary material for: C-X-C receptor 7 agonist acts as a C-X-C motif chemokine ligand 12 inhibitor to ameliorate osteoclastogenesis and bone resorption
Source: PubMed Central journal article supplement — Mol Med Rep. 2022 Jan 11;25(3):78. doi: 10.3892/mmr.2022.12594 (PMC8778739; doi:10.3892/mmr.2022.12594), 2022-01-11
Supplement: Supplementary_Data.pdf [file Supplementary_Data.pdf]

Table SI. F-values in this study.

| Figs.   | F-value          | F (0.95)         | F (0.99)         |
|---------|------------------|------------------|------------------|
| Fig. 1B | 71.0962138084633 | 3.49029482065465 | 5.95254468315918 |
| Fig. 1C | 89.2644401344095 | 3.49029482065465 | 5.95254468315918 |
| Fig. 1D | 84.7403436482918 | 3.49029482065465 | 5.95254468315918 |
| Fig. 2B | 36.2501697101537 | 3.49029482065465 | 5.95254468315918 |
| Fig. 3A | 121.49516570203  | 3.49029482065465 | 5.95254468315918 |
| Fig. 3B | 79.8501127405132 | 3.49029482065465 | 5.95254468315918 |
| Fig. 4A | 1856.37732083459 | 2.77285315275033 | 4.24788214939439 |
| Fig. 4B | 1430.18819635962 | 2.77285315275033 | 4.24788214939439 |
